# Supplementary material for: Highly efficient synthesis of novel methyl 132-methylene mesopyropheophorbide a and its stereoselective Michael addition reaction
Source: Royal Society of Chemistry journal article supplement (doi:10.1039/c4ob02491e), 2014-12-23
Supplement: c4ob02491e1.pdf [file c4ob02491e1.pdf]

Electronic Supporting Information for

**Highly efficient synthesis of novel methyl 13<sup>2</sup>-methylene mesopyropheophorbide *a* by pH-dependent regionselective condensation with formaldehyde and its stereoselective Michael addition reaction**

Jiazhu Li,<sup>a</sup> Yang Liu,<sup>a</sup> Xi-Sen Xu,<sup>a</sup> Yan-Long Li,<sup>a</sup> Shan-Guo Zhang,<sup>a</sup> Il Yoon,<sup>b</sup> Young Key Shim,<sup>b</sup> Jin-Jun Wang\*<sup>a</sup> and Jun-Gang Yin\*<sup>c</sup>

<sup>a</sup> *College of Chemistry and Chemical Engineering, Yantai University, Yantai, 264005, China*

<sup>b</sup> *PDT Research Institute, School of Nano System Engineering, Inje University, Gimhae, 621-749, Korea*

<sup>c</sup> *College of Life Sciences, Yantai University, Yantai, 264005, China.*

\*E-mail addresses: wjj1955@163.com; jungangyin@163.com

**Table of Contents**

1. Supporting Tables and Figures
2. General Information
3. Experimental Procedure and characterization of products
4. NMR (1D, 2D, <sup>1</sup>H, <sup>13</sup>C) and MS (ESI) spectrum of products
5. References

## 1. Supporting Tables and Figures

**Table S1.** The reaction of methyl mesoporphorphorbide **5** with formaldehyde sources (40% formalin or paraformaldehyde) in various conditions.

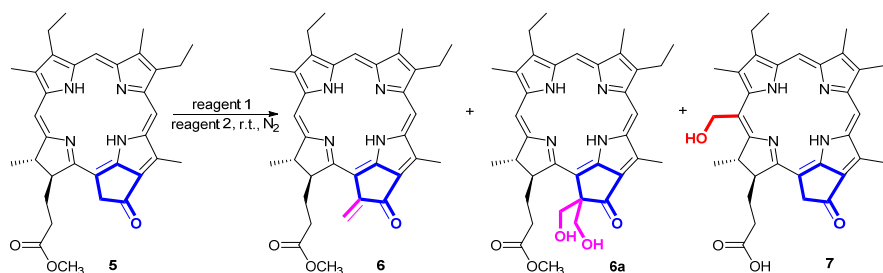

| entry | reagent 1 (eq.)               | reagent 2 (eq.) | time (h) | yield ( <b>6</b> ) <sup>a</sup> | yield ( <b>6a</b> ) <sup>a</sup> | yield ( <b>7</b> ) <sup>a</sup> |
|-------|-------------------------------|-----------------|----------|---------------------------------|----------------------------------|---------------------------------|
| 1     | 40% formalin (1.2)            | NaOMe (5.0)     | 6        | 15%                             | 10%                              | /                               |
| 2     | 40% formalin (5.0)            | NaOMe (10.0)    | 6        | 47%                             | 24%                              | /                               |
| 3     | 40% formalin (5.0)            | NaOMe (10.0)    | 12       | 45%                             | 24%                              | /                               |
| 4     | 40% formalin (10.0)           | NaOMe (10.0)    | 6        | 49%                             | 30%                              | /                               |
| 5     | 40% formalin (10.0)           | NaH (2.5)       | 6        | 30%                             | 13%                              | /                               |
| 6     | 40% formalin (10.0)           | NaH (5.0)       | 6        | 48%                             | 25%                              | /                               |
| 7     | 40% formalin (10.0)           | NaH (10.0)      | 6        | 48%                             | 25%                              | /                               |
| 8     | paraformaldehyde <sup>b</sup> | NaOMe (5.0)     | 6        | 71%                             | 12%                              | /                               |
| 9     | paraformaldehyde <sup>b</sup> | NaOMe (10.0)    | 6        | 85%                             | 6%                               | /                               |
| 10    | paraformaldehyde <sup>b</sup> | NaOMe (20.0)    | 6        | 80%                             | 5%                               | /                               |
| 11    | 40% formalin (10.0)           | TsOH (10.0)     | 96       | / <sup>c</sup>                  | /                                | /                               |
| 12    | 40% formalin (10.0)           | TFA             | 96       | /                               | /                                | /                               |
| 13    | 40% formalin (10.0)           | conc. HCl       | 96       | /                               | /                                | 5%                              |
| 14    | 40% formalin (10.0)           | combined acid   | 72       | /                               | /                                | 65%                             |
| 15    | 40% formalin (10.0)           | combined acid   | >96      | /                               | /                                | 64%                             |

<sup>a</sup> After standard treatment with 5% H<sub>2</sub>SO<sub>4</sub>/MeOH. <sup>b</sup> Equal-weight was used as methyl mesoporphorphorbide **5**. <sup>c</sup> No product was observed.

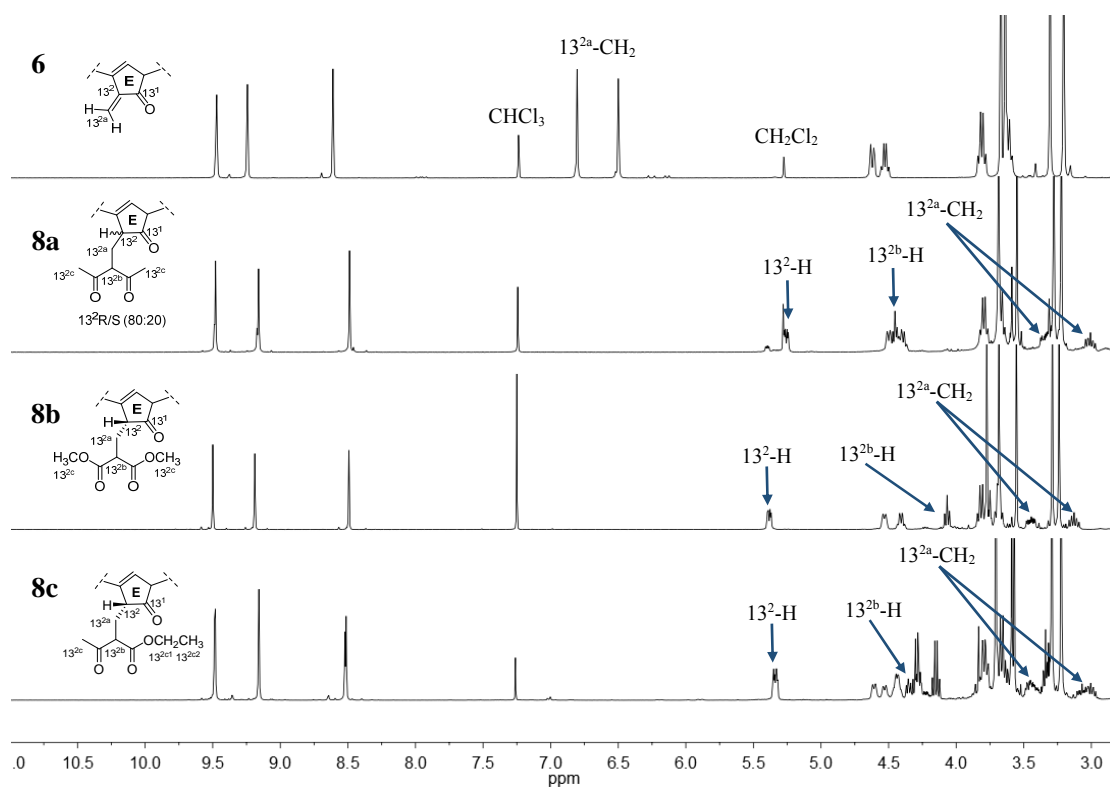

**Fig. S1.** The comparative  $^1\text{H}$  NMR spectra ( $\text{CDCl}_3$ , 400 MHz) in the region  $\delta$  2.8–11.0 ppm of methyl  $13^2$ -methylene mesopyropheophorbide **6** and its Michael reaction adducts **8a** - **8c**.

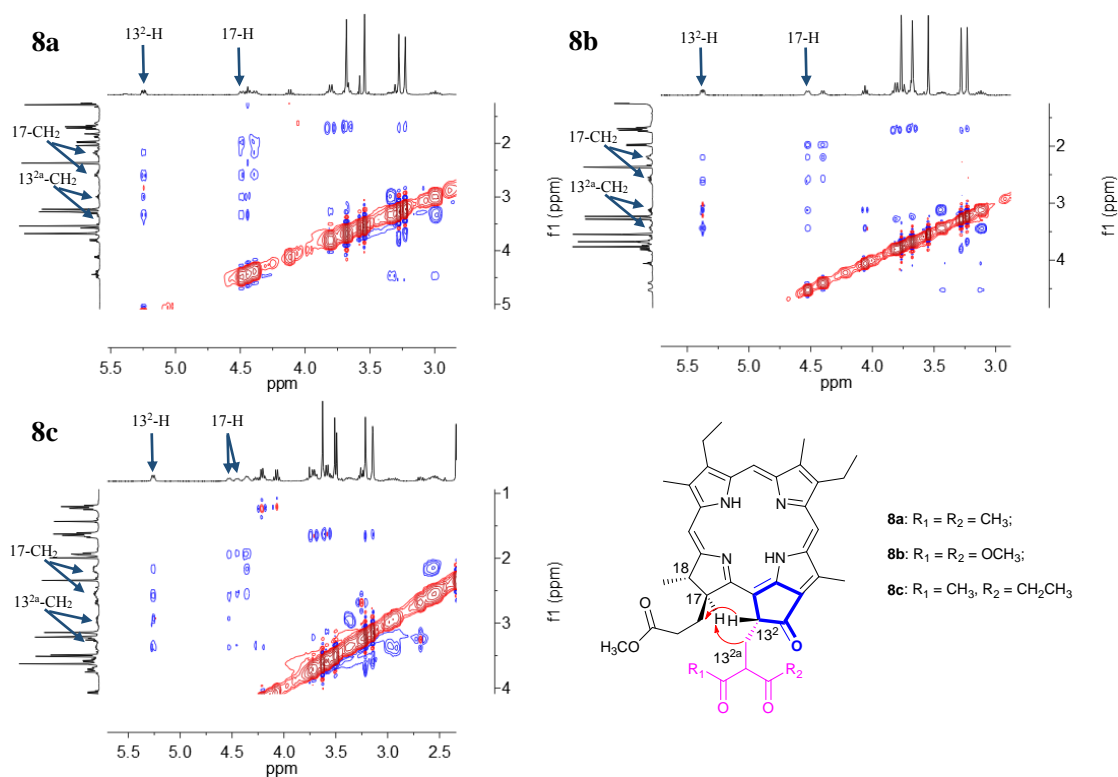

**Fig. S2.** NOE interactions (selected) observed in 2D/NOESY  $^1\text{H}$  NMR spectra of Michael reaction adducts **8a** - **8c**.

## 2. General Information

All reactions were monitored by TLC using 0.20 mm silica gel plates with or without UV indicator (60F–254). Silica gel 60 (230–400 mesh, Merck) was used for flash column chromatography.  $^1\text{H}$  and  $^{13}\text{C}$  NMR spectra were measured at 400 and 101 MHz, respectively, on a Bruker Advance II spectrometer. COSY and NOESY techniques were used to assign the NMR peak. Chemical shifts ( $\delta$ ) are given in ppm relative to tetramethylsilane (TMS, 0 ppm) unless otherwise indicated. Electronic absorption spectra were measured on a AOE A560 UV–Vis spectrophotometer. The absorption maxima  $\lambda_{\text{max}}$  are given in nm and molar absorbance coefficient ( $\epsilon$ ) or relative intensity. MS(ESI) were obtained on a AB SCIEX API 4000 LC/MS System at Yantai University. Materials obtained from commercial suppliers were used without further purification. Methyl mesopyropheophorbide **5** was prepared according to the procedure described in the literature<sup>[1]</sup>.

## 3. Experimental Procedure and characterization of products

### *Synthesis of methyl 13<sup>2</sup>-methylene mesopyropheophorbide a 6 and methyl 13<sup>2</sup>-dihydromethyl mesopyropheophorbide a 6a*

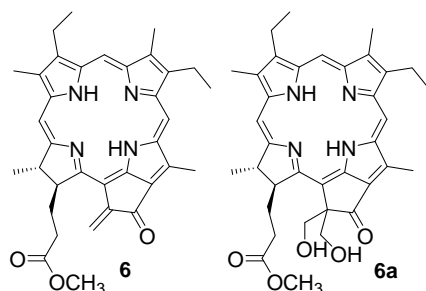

Methyl mesopyropheophorbide **5** (300 mg, 0.545 mmol) and paraformaldehyde (300 mg) was dissolved in THF (50 mL), and a solution of sodium methoxide in methanol (1mol/L, 5.45mL) was added under  $\text{N}_2$  atmosphere, then the reaction mixture was stirring at room temperature under

$\text{N}_2$  atmosphere for 6 h, monitoring the progress spectroscopically. pH value of the reaction mixture was adjusted to 4-6 by adding diluted hydrochloric acid and extracted with dichloromethane. The combined organic layers were washed with water, dried over sodium sulfate, and evaporated in vacuum. The residue was dissolved in 100 mL methanol containing 5%  $\text{H}_2\text{SO}_4$  and allowed to stir at room temperature under  $\text{N}_2$  atmosphere overnight to recover the 17<sup>3</sup>-methyl ester structure. The mixture was diluted with water and extracted with dichloromethane. The combined organic layers were washed with water, dried over sodium sulfate, and evaporated in vacuum. The residue was separated on silica gel (eluent: dichloromethane-acetone, gradient 2-4% acetone) to give 261 mg (0.463 mmol, 85%) of the title compound **6** as dark green solid and 20 mg (0.033mmol, 6%) of **6a** as a byproduct. **6**: UV-VIS ( $\text{CH}_2\text{Cl}_2$ )  $\lambda_{\text{max}}$  409 (relative intensity, 0.90), 427 (1.00), 520 (0.10), 556 (0.08), 609 (0.07), 664 (0.41) nm.  $^1\text{H}$  NMR (400 MHz,  $\text{CDCl}_3$ )  $\delta$  9.46 (s, 1H, 10-H), 9.24 (s, 1H, 5-

H), 8.61 (s, 1H, 20-H), 6.81 (s, 1H, 13<sup>2a</sup>-H), 6.50 (s, 1H, 13<sup>2a</sup>-H), 4.62 (d,  $J = 9.3$  Hz, 1H, 17-H), 4.53 (q,  $J = 7.2$  Hz, 1H, 18-H), 3.81 (q,  $J = 7.5$  Hz, 2H, 3<sup>1</sup>-CH<sub>2</sub>), 3.66, 3.64, 3.30, 3.20 (each s, each 3H, OCH<sub>3</sub> + CH<sub>3</sub>), 3.64 – 3.56 (m, 2H, 8<sup>1</sup>-CH<sub>2</sub>), 2.72 – 2.60, 2.36 – 2.27, 2.07 – 1.96 (each m, total 4H, 17<sup>1</sup> + 17<sup>2</sup>-CH<sub>2</sub>), 1.83 (d,  $J = 7.3$  Hz, 3H, 18-CH<sub>3</sub>), 1.71 (t,  $J = 7.6$  Hz, 3H, 3<sup>2</sup>-CH<sub>3</sub>), 1.65 (t,  $J = 7.5$  Hz, 3H, 8<sup>2</sup>-CH<sub>3</sub>), 0.08, -1.96 (each brs, each 1H, 2 × NH). <sup>13</sup>C NMR (101 MHz, CDCl<sub>3</sub>) δ 187.13, 173.53, 171.43, 161.88, 154.78, 150.44, 149.65, 149.10, 145.00, 142.01, 141.90, 136.91, 136.51, 135.97, 131.15, 128.63, 128.46, 112.82, 106.64, 104.52, 97.04, 93.31, 51.69, 51.43, 49.79, 31.24, 29.31, 23.54, 19.47, 19.42, 17.50, 17.01, 12.20, 11.29, 10.99. MS (ESI): calcd for C<sub>35</sub>H<sub>38</sub>N<sub>4</sub>O<sub>3</sub> 562.3; found  $m/z$  563.7 (MH<sup>+</sup>). Anal. calcd for C<sub>35</sub>H<sub>38</sub>N<sub>4</sub>O<sub>3</sub> C 74.71, H 6.81, N 9.96. Found C 74.75, H 6.84, N 10.01. **6a**: UV-VIS (CH<sub>2</sub>Cl<sub>2</sub>) λ<sub>max</sub> 408 (relative intensity, 1.0), 504 (0.09), 536 (0.09), 603 (0.08), 658 (0.35) nm. <sup>1</sup>H NMR (400 MHz, CDCl<sub>3</sub>) δ 9.35 (s, 1H, 10-H), 9.06 (s, 1H, 5-H), 8.41 (s, 1H, 20-H), 5.06 (d,  $J = 11.5$  Hz, 1H, 13<sup>2a</sup>-CH<sub>2</sub>), 4.84 (d,  $J = 11.5$  Hz, 1H, 13<sup>2a</sup>-CH<sub>2</sub>), 4.73 (d,  $J = 11.4$  Hz, 1H, 13<sup>2a</sup>-CH<sub>2</sub>), 4.55 (d,  $J = 11.3$  Hz, 1H, 13<sup>2a</sup>-CH<sub>2</sub>), 4.42 – 4.32 (m, 2H, 17 + 18-H), 3.76 (q,  $J = 7.5$  Hz, 2H, 3<sup>1</sup>-CH<sub>2</sub>), 3.64 – 3.53 (m, 2H, 8<sup>1</sup>-CH<sub>2</sub>), 3.58, 3.26, 3.18, 2.85 (each s, each 3H, OCH<sub>3</sub> + CH<sub>3</sub>), 2.51 – 2.35, 2.28 – 2.20, 2.13 – 2.01 (each m, total 4H, 17<sup>1</sup> + 17<sup>2</sup>-CH<sub>2</sub>), 1.72 (t,  $J = 7.6$  Hz, 3H, 3<sup>2</sup>-CH<sub>3</sub>), 1.67 – 1.61 (m, 6H, 8<sup>2</sup> + 18-CH<sub>3</sub>), 0.03, -1.19 (each brs, each 1H, 2 × NH). MS (ESI): calcd for C<sub>36</sub>H<sub>42</sub>N<sub>4</sub>O<sub>5</sub> 610.3; found  $m/z$  611.7 (MH<sup>+</sup>). Anal. calcd for C<sub>36</sub>H<sub>42</sub>N<sub>4</sub>O<sub>5</sub> C 70.80, H 6.93, N 9.17. Found C 70.83, H 6.91, N 9.20.

#### **Synthesis of methyl 20-hydroxymethyl mesopyropheorbide a 7**

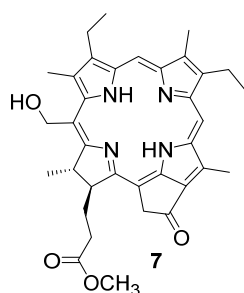

Methyl mesopyropheorbide **5** (200 mg, 0.363 mmol) and aqueous formalin (10 mL, 40%) was dissolved in a mixture of glacial acetic acid (10 mL), phosphoric acid (8 mL) and concentrated hydrochloric acid and allowed to stir at room temperature for 3 days. The reaction mixture was diluted with water and extracted with dichloromethane. The combined

organic layers were washed with water, dried over sodium sulfate, and evaporated in vacuum. The residue was dissolved in 100 mL methanol containing 5% H<sub>2</sub>SO<sub>4</sub> and allowed to stir at room temperature under N<sub>2</sub> atmosphere overnight to recover the 17<sup>3</sup>-methyl ester structure. The mixture was diluted with water and extracted with dichloromethane. The combined organic layers were washed with water, dried over sodium sulfate, and evaporated in vacuum. The residue was separated on silica gel (eluent: dichloromethane-methanol, gradient 2-4% methanol) to give the unreacted

starting material **5** (52 mg, 0.094 mmol, 26%) as the fast-moving band and the title compound **7** as dark green solid (137 mg, 0.236 mmol, 65%). UV-VIS (CH<sub>2</sub>Cl<sub>2</sub>)  $\lambda_{\max}$  412 (relative intensity, 1.00), 511 (0.11), 544 (0.12), 609 (0.08), 666 (0.35) nm. <sup>1</sup>H NMR (400 MHz, CDCl<sub>3</sub>)  $\delta$  9.43 (s, 1H, 10-H), 9.32 (s, 1H, 5-H), 6.36 (d,  $J$  = 12.8 Hz, 1H, 20<sup>1</sup>-H), 6.01 (d,  $J$  = 12.8 Hz, 1H, 20<sup>1</sup>-H), 5.19 (d,  $J$  = 19.8 Hz, 1H, 13<sup>2</sup>-H), 5.13 (d,  $J$  = 19.8 Hz, 1H, 13<sup>2</sup>-H), 4.80 (q,  $J$  = 7.1 Hz, 1H, 18-H), 4.20 (dd,  $J$  = 8.2, 3.3 Hz, 1H, 17-H), 3.90 – 3.82 (m, 2H, 3<sup>1</sup>-CH<sub>2</sub>), 3.63, 3.54, 3.45, 3.27 (each s, each 3H, OCH<sub>3</sub> + CH<sub>3</sub>), 3.66 (q,  $J$  = 7.6 Hz, 2H, 8<sup>1</sup>-CH<sub>2</sub>), 2.52 – 2.32, 2.23 – 2.11 (each m, total 4H, 17<sup>1</sup> + 17<sup>2</sup>-CH<sub>2</sub>), 1.71 (t,  $J$  = 7.6 Hz, 3H, 3<sup>2</sup>-CH<sub>3</sub>), 1.68 (t,  $J$  = 7.6 Hz, 3H, 8<sup>2</sup>-CH<sub>3</sub>), 1.50 (d,  $J$  = 7.0 Hz, 3H, 18-CH<sub>3</sub>), 0.70, -1.34 (each brs, each 1H, 2 × NH). MS (ESI): calcd for C<sub>35</sub>H<sub>40</sub>N<sub>4</sub>O<sub>4</sub> 580.3; found  $m/z$  581.3 (MH<sup>+</sup>). Anal. calcd for C<sub>35</sub>H<sub>40</sub>N<sub>4</sub>O<sub>4</sub> C 72.39, H 6.94, N 9.65. Found C 72.28, H 6.84, N 9.69.

**General procedure for the Michael reaction of compound 6 and the synthesis of compounds 8a-8c:**

Methyl 13<sup>2</sup>-methylene mesopyropheophorbide **6** (200 mg, 0.355 mmol) and corresponding reactive methylene compound (1 mL, acetylacetone for compound **8a**; dimethyl malonate for compound **8b** and ethyl acetoacetate for compound **8c**) was dissolved in THF (20 mL), and a solution of sodium methoxide in methanol (1mol/L, 3.55 mL) was added under N<sub>2</sub> atmosphere, then the reaction mixture was stirring at room temperature under N<sub>2</sub> atmosphere for 3 h, monitoring the progress spectroscopically. pH value of the reaction mixture was adjusted to 4-6 by adding diluted hydrochloric acid and extracted with dichloromethane. The combined organic layers were washed with water, dried over sodium sulfate, and evaporated in vacuum. The residue was separated on silica gel (eluent: dichloromethane-acetone, gradient 0.5-2.0% acetone) to give the desired compound **8a-8c** as dark green solids (yield: 90-94%).

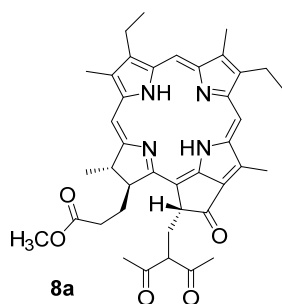

**8a:** Yield: 94%. UV-VIS (CH<sub>2</sub>Cl<sub>2</sub>)  $\lambda_{\max}$  410 (relative intensity, 1.00), 504 (0.10), 535 (0.09), 603 (0.08), 656 (0.35) nm. <sup>1</sup>H NMR (400 MHz, CDCl<sub>3</sub>)  $\delta$  9.47(9.48) (s, 1H, 10-H), 9.15(9.17) (s, 1H, 5-H), 8.48 (s, 1H, 20-H), 5.25(5.38) (dd,  $J$  = 8.6, 3.4 Hz, 1H, 13<sup>2</sup>-H), 4.49 (d,  $J$  = 8.8 Hz, 1H, 17-H), 4.45 (t,  $J$  = 6.3 Hz, 1H, 13<sup>2b</sup>-H), 4.39 (q,  $J$  = 7.9 Hz, 1H, 18-H), 3.79 (q,  $J$  = 7.5 Hz, 2H, 3<sup>1</sup>-CH<sub>2</sub>), 3.66 (q,  $J$  = 7.6 Hz, 2H, 8<sup>1</sup>-CH<sub>2</sub>), 3.68, 3.54(3.58), 3.27, 3.21 (each s, each 3H, OCH<sub>3</sub> + CH<sub>3</sub>), 3.37 – 3.31 (m, 1H, 13<sup>2a</sup>-H), 3.04 – 2.96 (m, 1H, 13<sup>2a</sup>-H), 2.65 – 2.51, 2.26 – 2.11 (each m, total 4H, 17<sup>1</sup> + 17<sup>2</sup>-CH<sub>2</sub>), 2.37 (s, 3H, COCH<sub>3</sub>), 1.98 (d,  $J$  = 7.3 Hz, 3H,

18-CH<sub>3</sub>), 1.71 (t, *J* = 7.7 Hz, 3H, 3<sup>2</sup>-CH<sub>3</sub>), 1.68 (t, *J* = 7.7 Hz, 3H, 8<sup>2</sup>-CH<sub>3</sub>), 1.28 (s, 3H, COCH<sub>3</sub>), 0.53, -1.60(-1.64) (each brs, each 1H, 2 × NH). <sup>13</sup>C NMR (101 MHz, CDCl<sub>3</sub>) δ 204.0, 203.6, 198.8, 180.0, 173.6, 172.4(172.3), 161.6, 155.9, 150.5, 149.0, 145.3, 142.6, 141.8, 137.5(137.3), 135.9, 131.6(131.5), 128.7, 127.7, 108.7, 104.3(104.2), 96.0, 92.7(92.5), 64.5, 55.6, 51.6(51.7), 50.6(50.7), 50.5(50.1), 31.0, 30.9, 30.1(30.0), 30.0(29.9), 29.6(29.7), 23.5(23.3), 19.5, 19.4, 17.5, 16.9, 12.1, 11.3, 11.0. MS (ESI): calcd for C<sub>40</sub>H<sub>46</sub>N<sub>4</sub>O<sub>5</sub> 662.4; found *m/z* 663.9 (MH<sup>+</sup>). Anal. calcd for C<sub>40</sub>H<sub>46</sub>N<sub>4</sub>O<sub>5</sub> C 72.48, H 7.00, N 8.45. Found C 72.46, H 6.98, N 8.49.

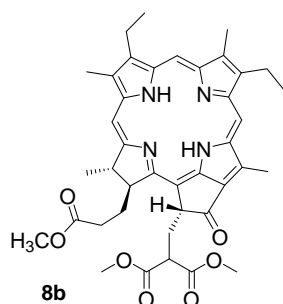

**8b:** Yield: 90%. UV-VIS (CH<sub>2</sub>Cl<sub>2</sub>) λ<sub>max</sub> 410 (relative intensity, 1.00), 504 (0.10), 535 (0.08), 603 (0.07), 657 (0.36) nm. <sup>1</sup>H NMR (400 MHz, CDCl<sub>3</sub>) δ 9.48 (s, 1H, 10-H), 9.17 (s, 1H, 5-H), 8.49 (s, 1H, 20-H), 5.38 (dd, *J* = 8.1, 3.2 Hz, 1H, 13<sup>2</sup>-H), 4.52 (d, *J* = 8.5 Hz, 1H, 17-H), 4.40 (q, *J* = 7.4 Hz, 1H, 18-H), 4.06 (t, *J* = 7.1 Hz, 1H, 13<sup>2b</sup>-H), 3.79 (q, *J* = 7.4 Hz, 2H, 3<sup>1</sup>-CH<sub>2</sub>), 3.77, 3.67, 3.55, 3.28, 3.22, 2.36 (each s, each 3H, OCH<sub>3</sub> + CH<sub>3</sub>), 3.67 (q, *J* = 7.3 Hz, 2H, 8<sup>1</sup>-CH<sub>2</sub>), 3.47 – 3.41 (m, 1H, 13<sup>2a</sup>-H), 3.19 – 3.08 (m, 1H, 13<sup>2a</sup>-H), 2.66 – 2.52, 2.26 – 2.13 (each m, total 4H, 17<sup>1</sup> + 17<sup>2</sup>-CH<sub>2</sub>), 1.98 (d, *J* = 7.3 Hz, 3H, 18-CH<sub>3</sub>), 1.72 (t, *J* = 7.7 Hz, 3H, 3<sup>2</sup>-CH<sub>3</sub>), 1.69 (t, *J* = 7.7 Hz, 3H, 8<sup>2</sup>-CH<sub>3</sub>), 0.46, -1.64 (each brs, each 1H, 2 × NH). <sup>13</sup>C NMR (101 MHz, CDCl<sub>3</sub>) δ 198.36, 173.60, 172.13, 170.02, 169.99, 161.46, 155.60, 150.45, 149.10, 145.22, 142.41, 141.77, 137.48, 137.26, 135.77, 131.48, 128.91, 127.86, 108.24, 104.34, 96.01, 92.51, 55.34, 52.67, 51.64, 51.63, 51.61, 50.64, 50.39, 48.64, 31.25, 30.97, 30.06, 23.28, 19.49, 19.37, 17.47, 16.91, 12.11, 11.28, 10.96. MS (ESI): calcd for C<sub>40</sub>H<sub>46</sub>N<sub>4</sub>O<sub>7</sub> 694.3; found *m/z* 695.9 (MH<sup>+</sup>). Anal. calcd for C<sub>40</sub>H<sub>46</sub>N<sub>4</sub>O<sub>7</sub> C 69.15, H 6.67, N 8.06. Found C 69.21, H 6.65, N 8.09.

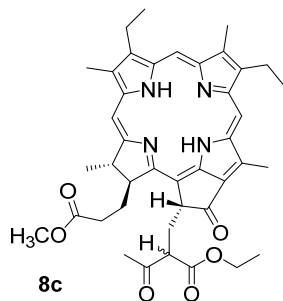

**8c:** Yield: 93%. UV-VIS (CH<sub>2</sub>Cl<sub>2</sub>) λ<sub>max</sub> 410 (relative intensity, 1.00), 504 (0.09), 534 (0.09), 601 (0.08), 657 (0.40) nm. <sup>1</sup>H NMR (400 MHz, CDCl<sub>3</sub>) δ 9.50(9.49) (s, 1H, 10-H), 9.18 (s, 1H, 5-H), 8.50(8.49) (s, 1H, 20-H), 5.30 (d, *J* = 7.8 Hz, 1H, 13<sup>2</sup>-H), 4.57(4.49) (d, *J* = 8.3 Hz, 1H, 17-H), 4.40 (q, *J* = 7.2 Hz, 1H, 18-H), 4.33 – 4.19 (m, 3H, 13<sup>2b</sup>-H+ 13<sup>2b</sup>-CO<sub>2</sub>CH<sub>2</sub>CH<sub>3</sub>), 3.81 (q, *J* = 7.6 Hz, 2H, 3<sup>1</sup>-CH<sub>2</sub>), 3.68 (q, *J* = 7.3 Hz, 2H, 8<sup>1</sup>-CH<sub>2</sub>), 3.69, 3.56(3.54), 3.29, 3.24, 2.38(1.47) (each s, each 3H, OCH<sub>3</sub> + CH<sub>3</sub>), 3.48 – 3.34 (m, 1H, 13<sup>2a</sup>-H), 3.06 – 2.92 (m, 1H, 13<sup>2a</sup>-H), 2.78 – 2.51, 2.25 – 2.16 (each m, total 4H, 17<sup>1</sup> + 17<sup>2</sup>-CH<sub>2</sub>), 1.97(1.96) (d, *J* = 7.0 Hz, 3H, 18-CH<sub>3</sub>), 1.77 – 1.67 (m, 6H, 3<sup>2</sup> + 8<sup>2</sup>-CH<sub>3</sub>), 1.29 (t, *J* = 7.1 Hz, 3H, 13<sup>2b</sup>-CO<sub>2</sub>CH<sub>2</sub>CH<sub>3</sub>), 0.49, -

1.61(-1.63) (each brs, each 1H, 2 × NH). <sup>13</sup>C NMR (101 MHz, CDCl<sub>3</sub>) δ 203.3(203.1), 198.9, 173.6, 172.2, 169.8, 169.5, 161.5(161.4), 155.7(155.6), 150.5, 149.0(148.9), 145.2(145.1), 142.4, 141.8(141.7), 137.4, 137.3, 135.8(135.7), 131.6(131.5), 128.8(128.7), 127.7, 104.24, 95.95, 92.66(92.54), 61.59, 60.64, 56.29(56.04), 55.39(55.32), 51.62(51.58), 50.65(50.44), 31.03(30.99), 30.39(30.15), 30.04(29.54), 23.44(23.27), 19.48, 19.36, 17.47, 16.91, 14.11, 12.89, 12.11, 11.28, 10.96. MS (ESI): calcd for C<sub>41</sub>H<sub>48</sub>N<sub>4</sub>O<sub>6</sub> 692.4; found *m/z* 693.6 (MH<sup>+</sup>). Anal. calcd for C<sub>41</sub>H<sub>48</sub>N<sub>4</sub>O<sub>6</sub> C 71.08, H 6.98, N 8.09. Found C 71.12, H 7.00, N 8.05.

#### Synthesis of 20-formyl meso pyropheophorbide **9**

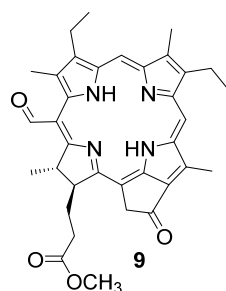

Compound **7** (100 mg, 0.172 mmol) was dissolved in 10 mL dry dichloromethane containing NMO (26 mg, 0.258 mmol). After stirring the mixture for 10 min, TPAP (10 mg, 0.028 mmol) was added and allowed to stir at room temperature for 1 h. The reaction mixture was diluted with dichloromethane and then washed with sodium sulphite solution and brine.

The organic layer was dried over sodium sulfate, and evaporated in vacuum. The residue was separated on silica gel (eluent: dichloromethane-acetone, gradient 0.5-2.0% acetone) to give the title compound **9** as dark green solid (68 mg, 0.117 mmol, 68%). UV-VIS (CH<sub>2</sub>Cl<sub>2</sub>) λ<sub>max</sub> 412 (relative intensity, 1.00), 513 (0.07), 549 (0.13), 631 (0.08), 689 (0.29) nm. <sup>1</sup>H NMR (400 MHz, CDCl<sub>3</sub>) δ 11.80 (s, 1H, 20-CHO), 9.27 (s, 1H, 10-H), 9.21 (s, 1H, 5-H), 5.18 (q, *J* = 7.0 Hz, 1H, 18-H), 5.05 (d, *J* = 20.0 Hz, 1H, 13<sup>2</sup>-H), 4.98 (d, *J* = 20.0 Hz, 1H, 13<sup>2</sup>-H), 4.03 (dd, *J* = 9.1, 3.1 Hz, 1H, 17-H), 3.74 (q, *J* = 7.6 Hz, 2H, 3<sup>1</sup>-CH<sub>2</sub>), 3.55 (q, *J* = 7.6 Hz, 2H, 8<sup>1</sup>-CH<sub>2</sub>), 3.61, 3.52, 3.24, 3.14 (each s, each 3H, OCH<sub>3</sub> + CH<sub>3</sub>), 2.65 – 2.57, 2.50 – 2.42, 2.34 – 2.27, 2.17 – 2.06 (each m, total 4H, 17<sup>1</sup> + 17<sup>2</sup>-CH<sub>2</sub>), 1.66 (t, *J* = 7.6 Hz, 3H, 3<sup>2</sup>-CH<sub>3</sub>), 1.63 (t, *J* = 7.6 Hz, 3H, 8<sup>2</sup>-CH<sub>3</sub>), 1.42 (d, *J* = 7.0 Hz, 3H, 18-CH<sub>3</sub>), 0.88, 0.04 (each brs, each 1H, 2 × NH). MS (ESI): calcd for C<sub>35</sub>H<sub>38</sub>N<sub>4</sub>O<sub>4</sub> 578.3; found *m/z* 579.3 (MH<sup>+</sup>). Anal. calcd for C<sub>35</sub>H<sub>38</sub>N<sub>4</sub>O<sub>4</sub> C 72.64, H 6.62, N 9.68. Found C 72.68, H 6.67, N 9.70.

#### 4. NMR (1D, 2D, <sup>1</sup>H, <sup>13</sup>C) and MS (ESI) spectrum of products



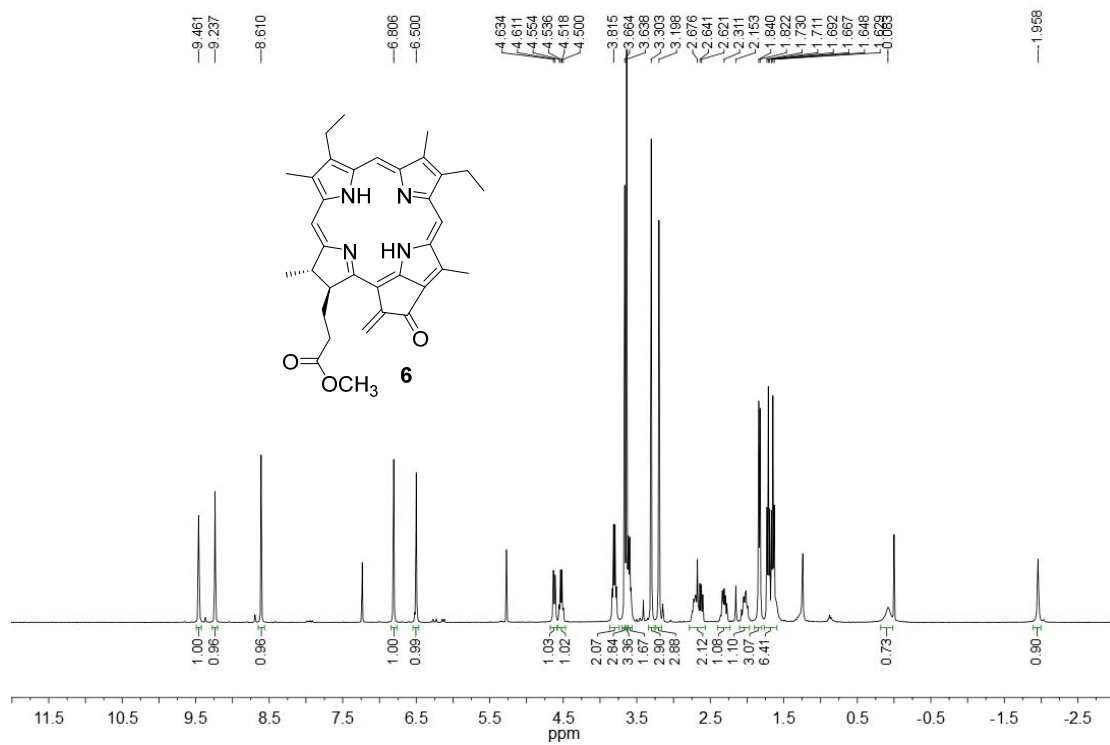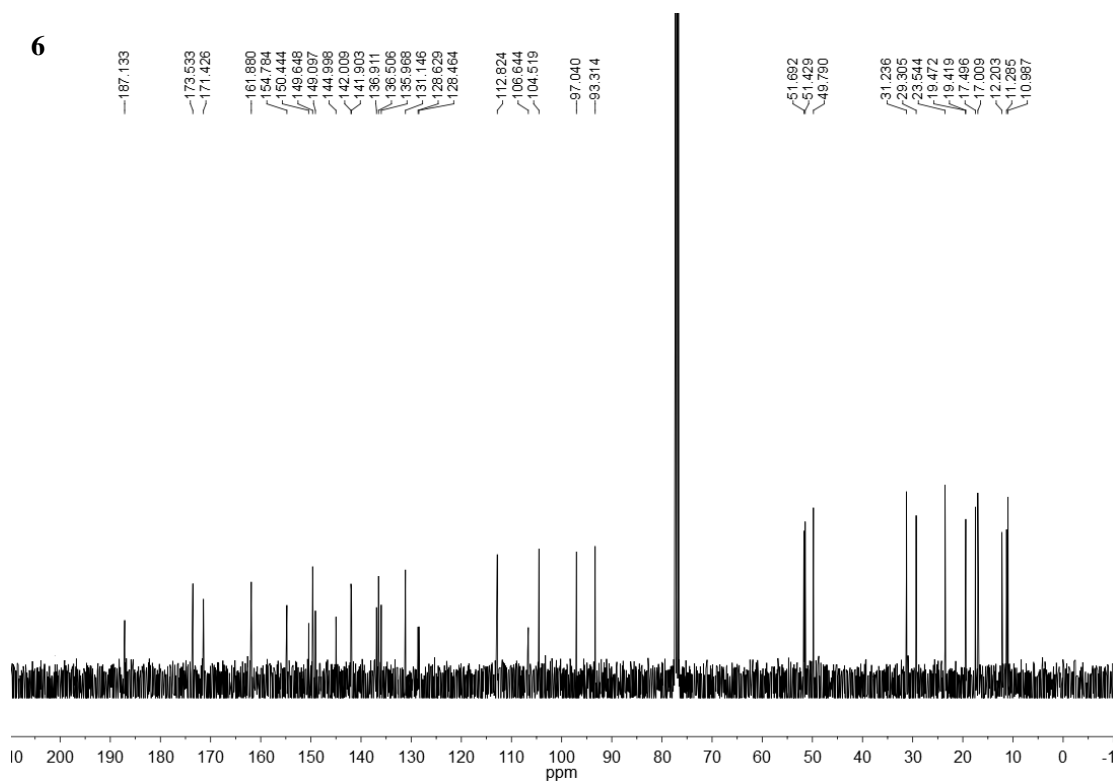

6

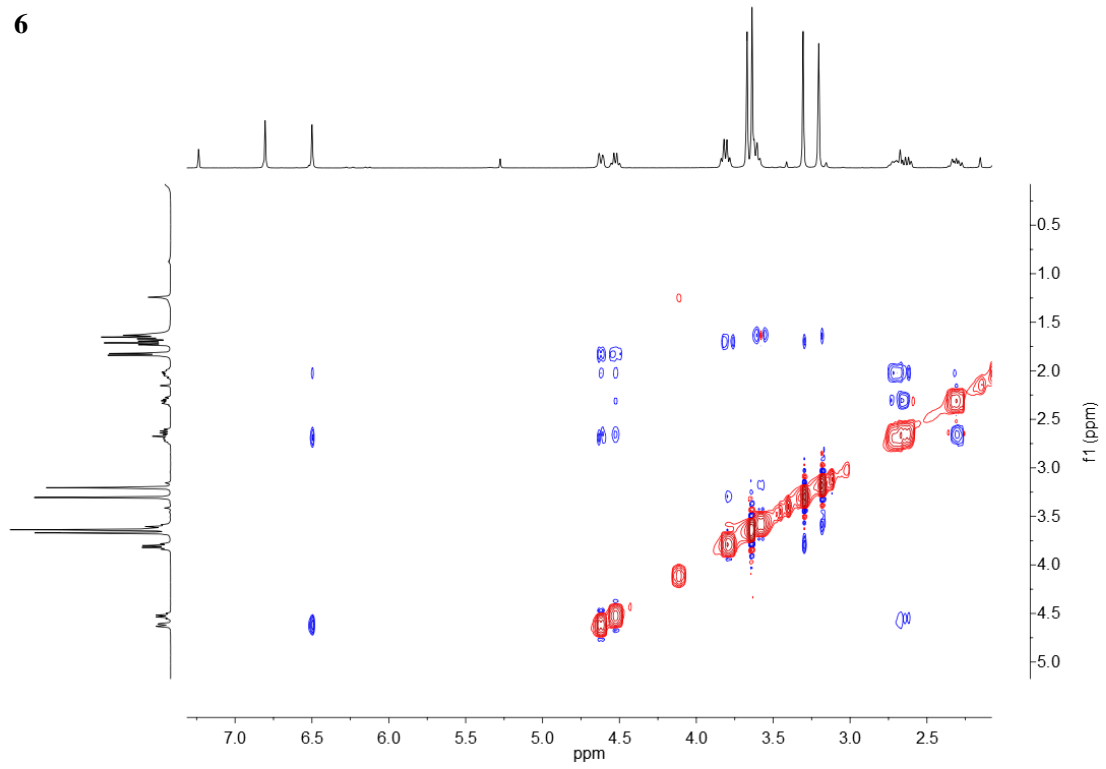

6

+Q1: 238 MCA scans from Sample 3 (TuneSampleID002) of lijiazhu10.10 .wiff (Turbo Spray)

Max. 2.6e7 cps.

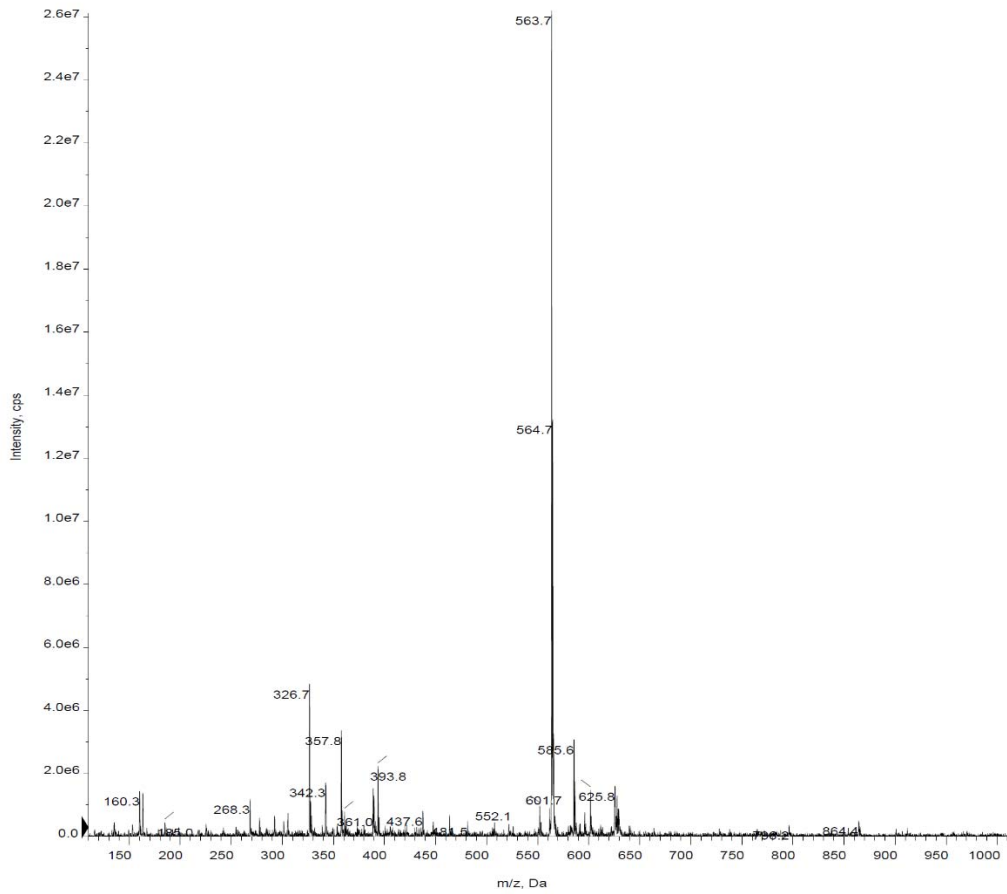

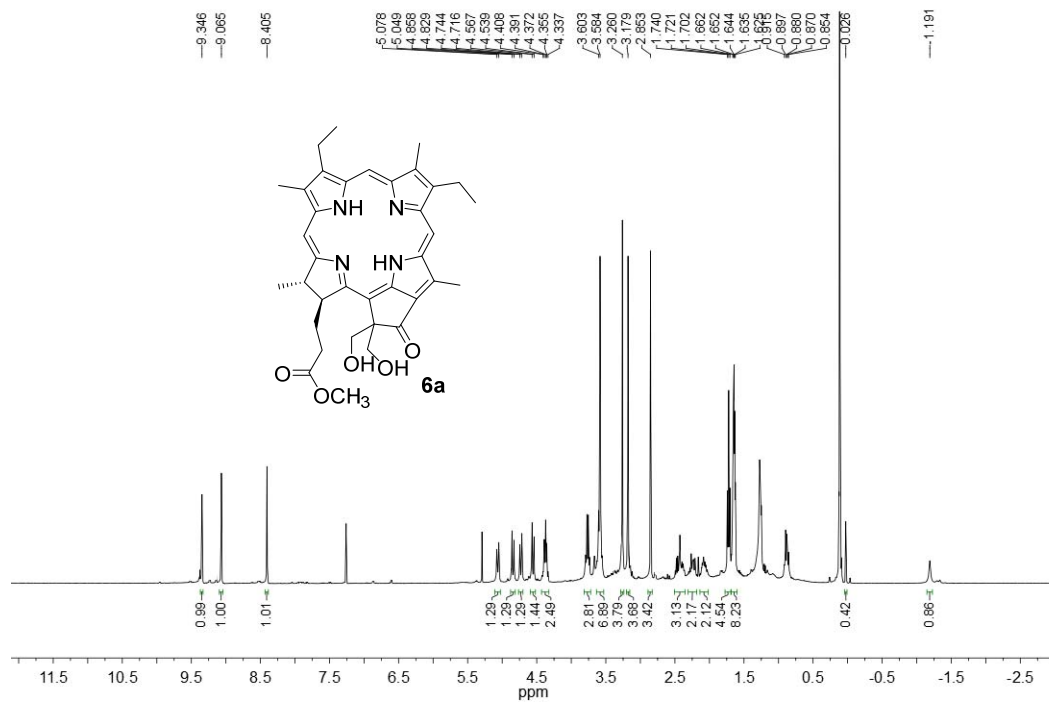

+Q1: 238 MCA scans from Sample 7 (132) of Iijiazhu10.10 .wiff (Turbo Spray)

Max. 6.0e8 cps.

**6a**

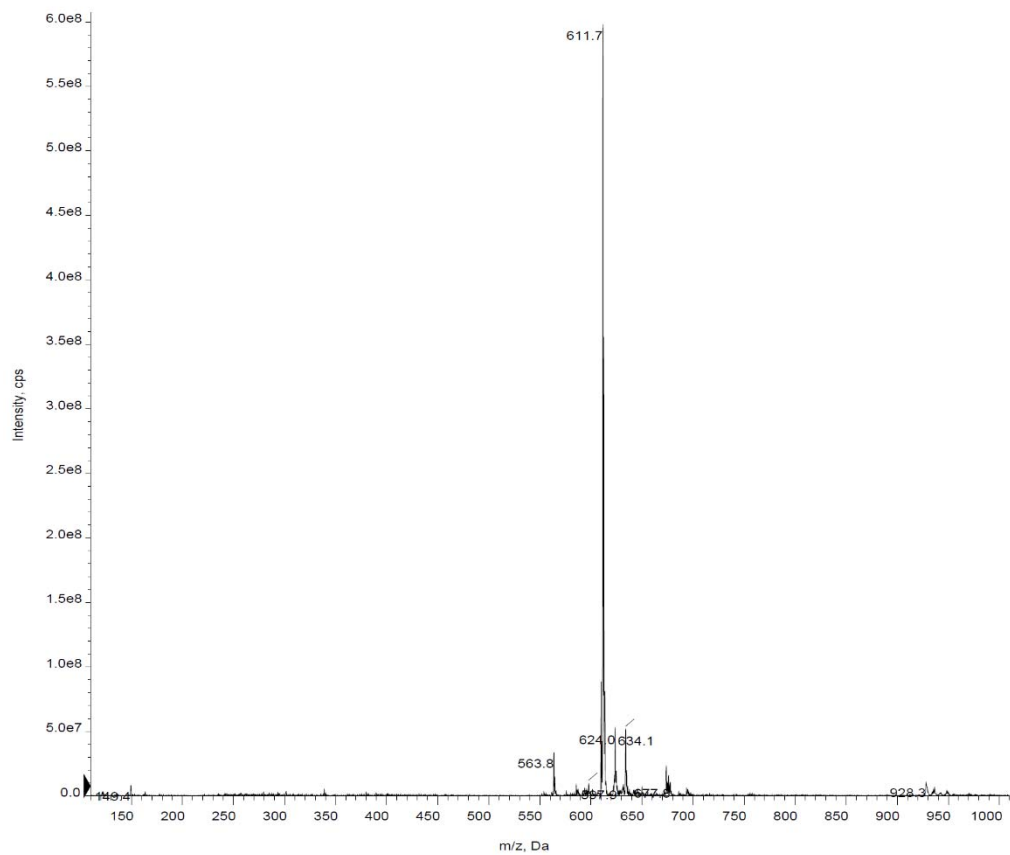

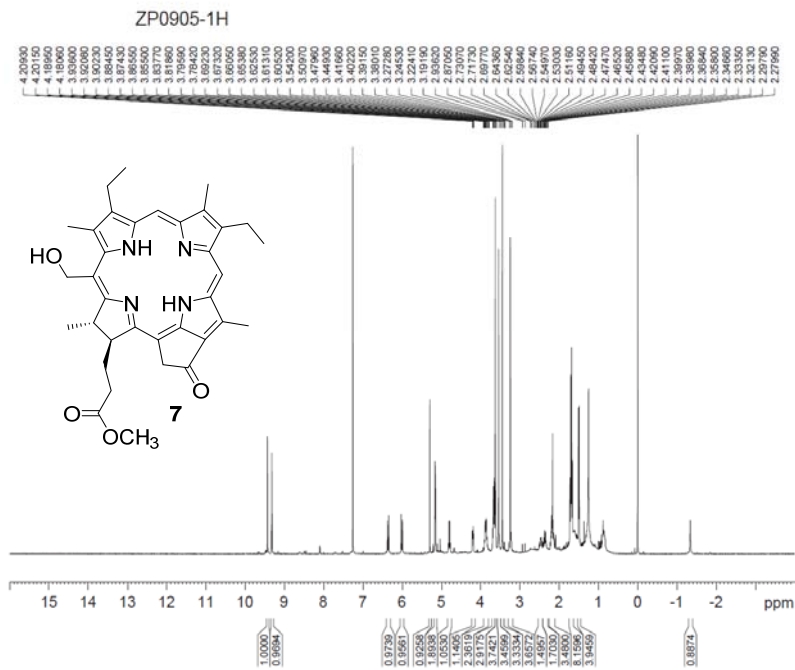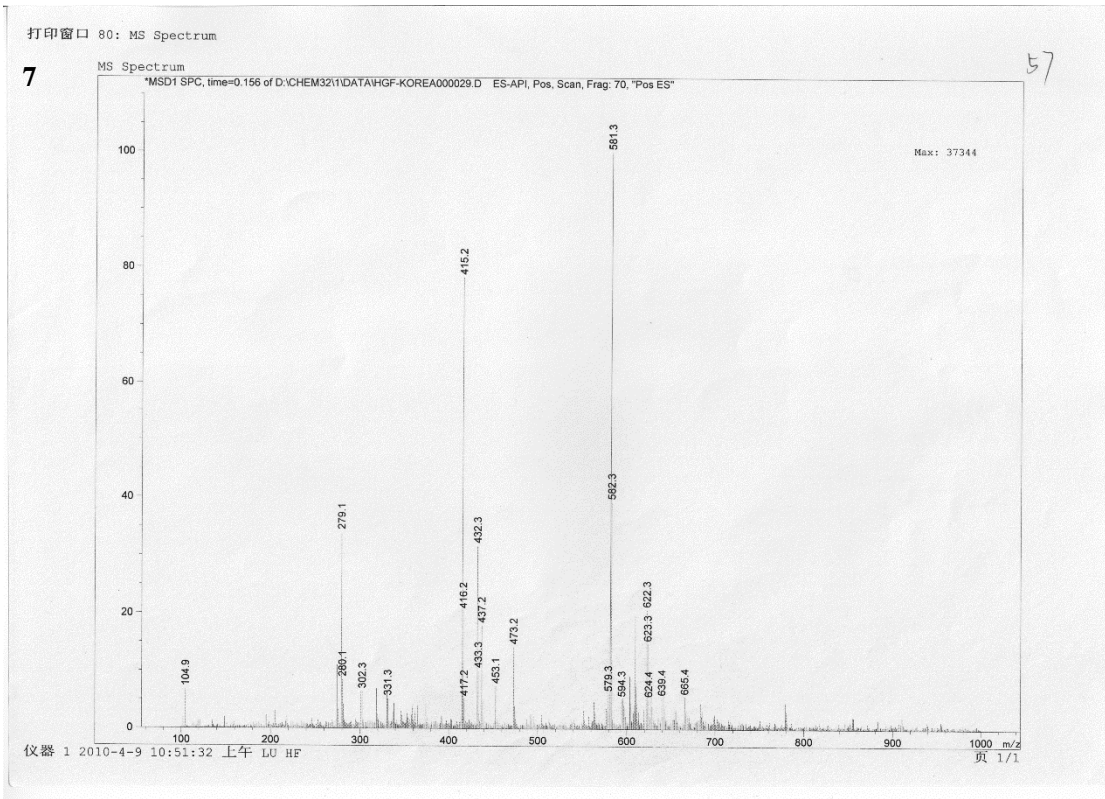

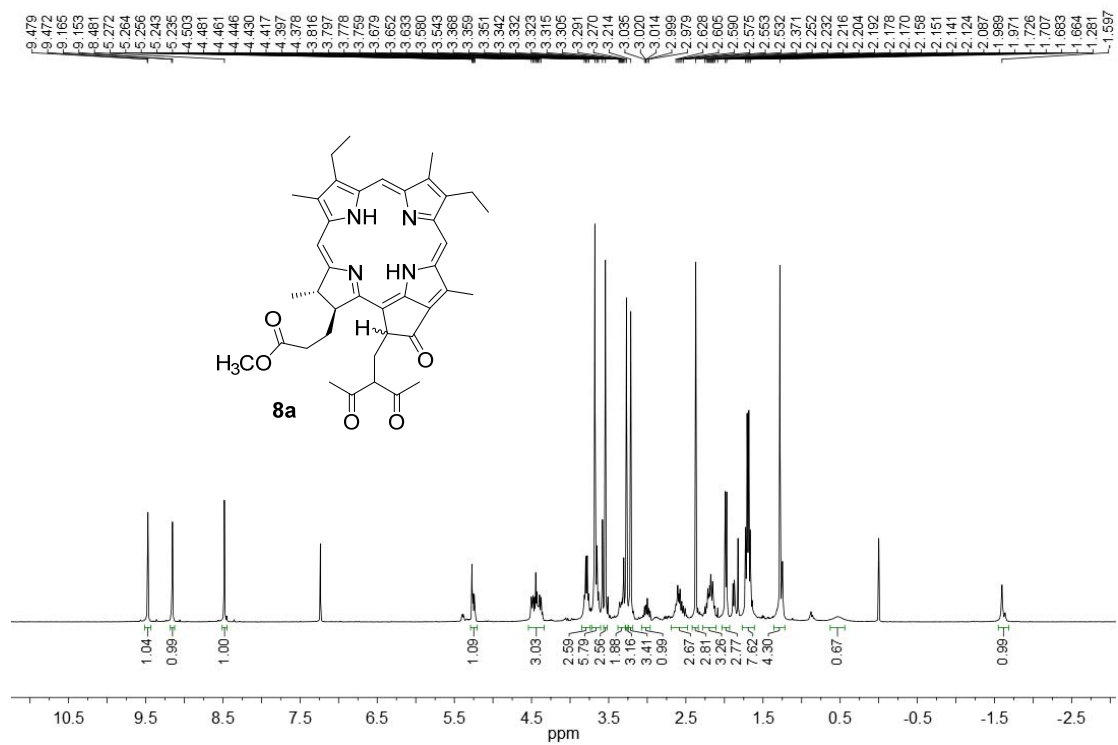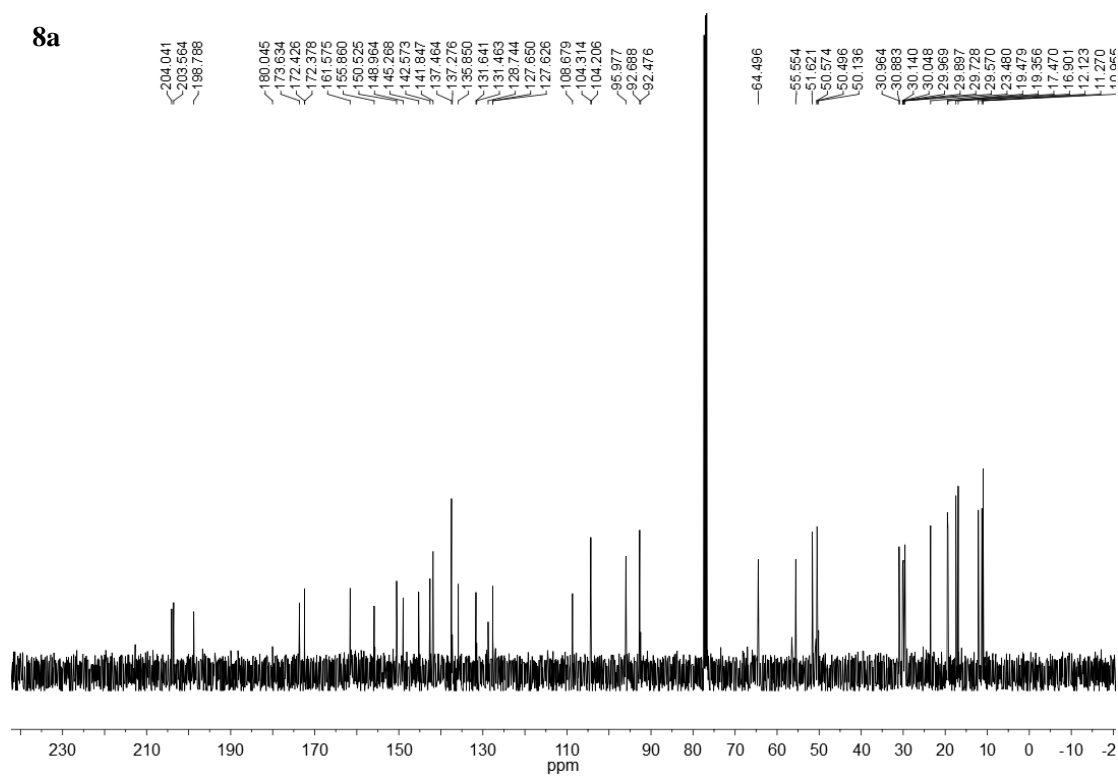

8a

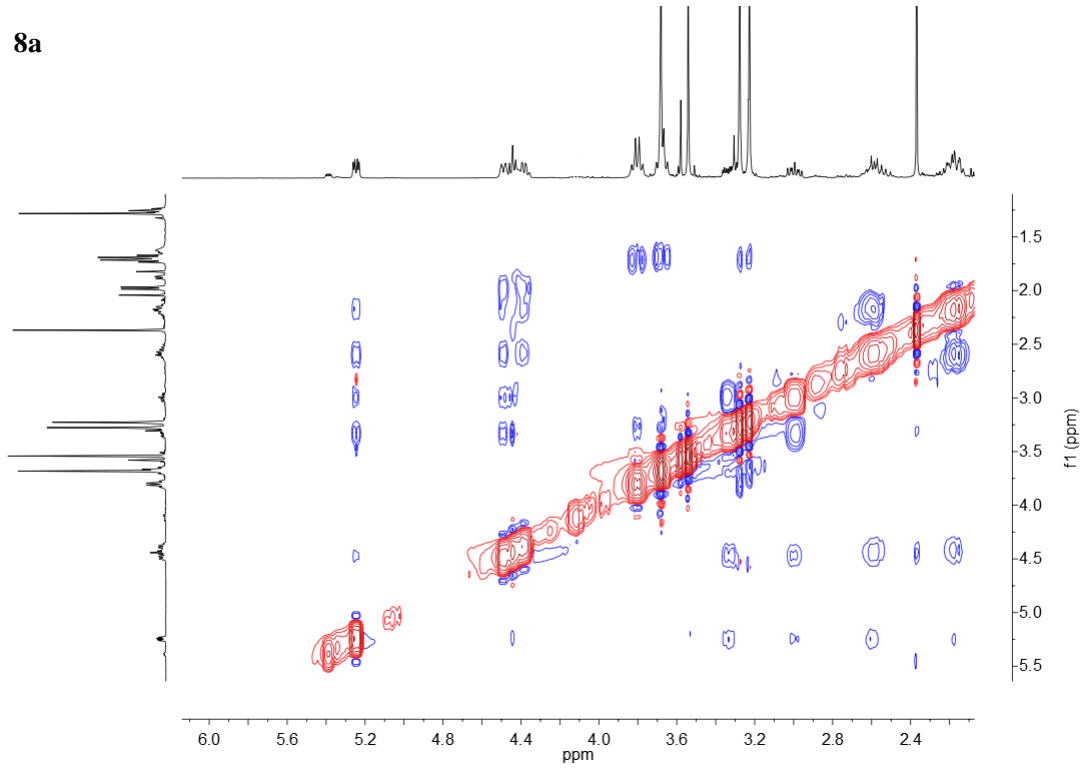

+Q1: 238 MCA scans from Sample 4 (TuneSampleID1416) of Iijiazhu10.10 .wiff (Turbo Spray)

Max. 5.0e7 cps.

8a

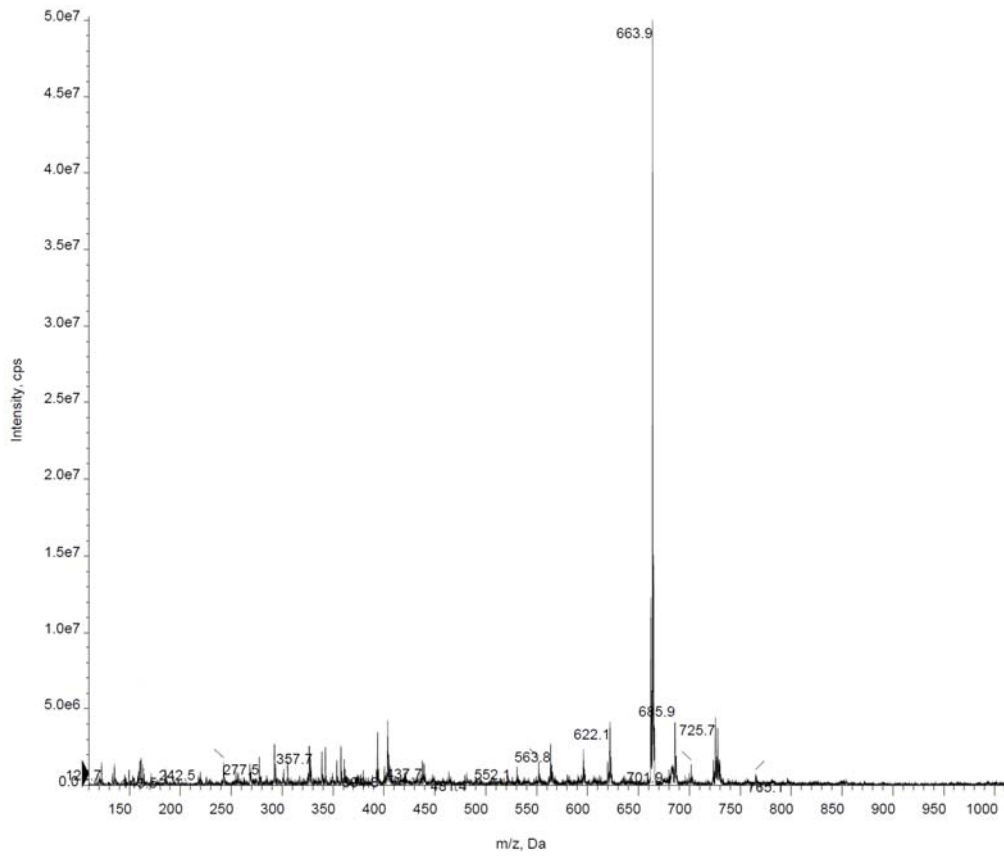

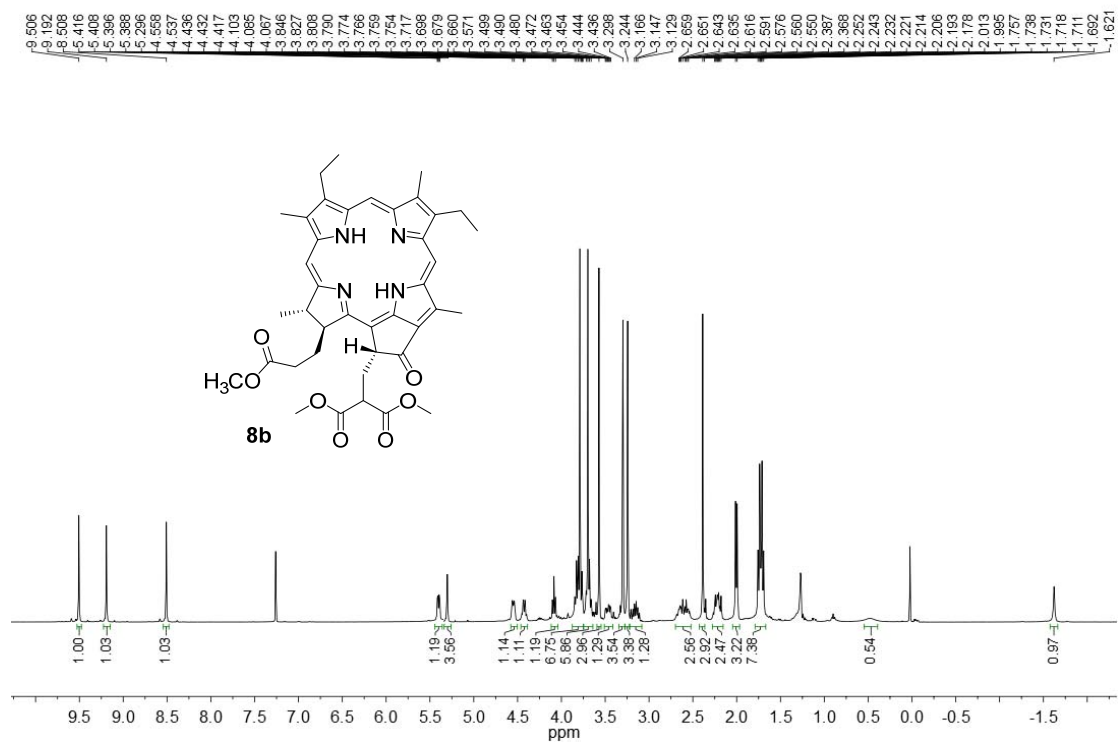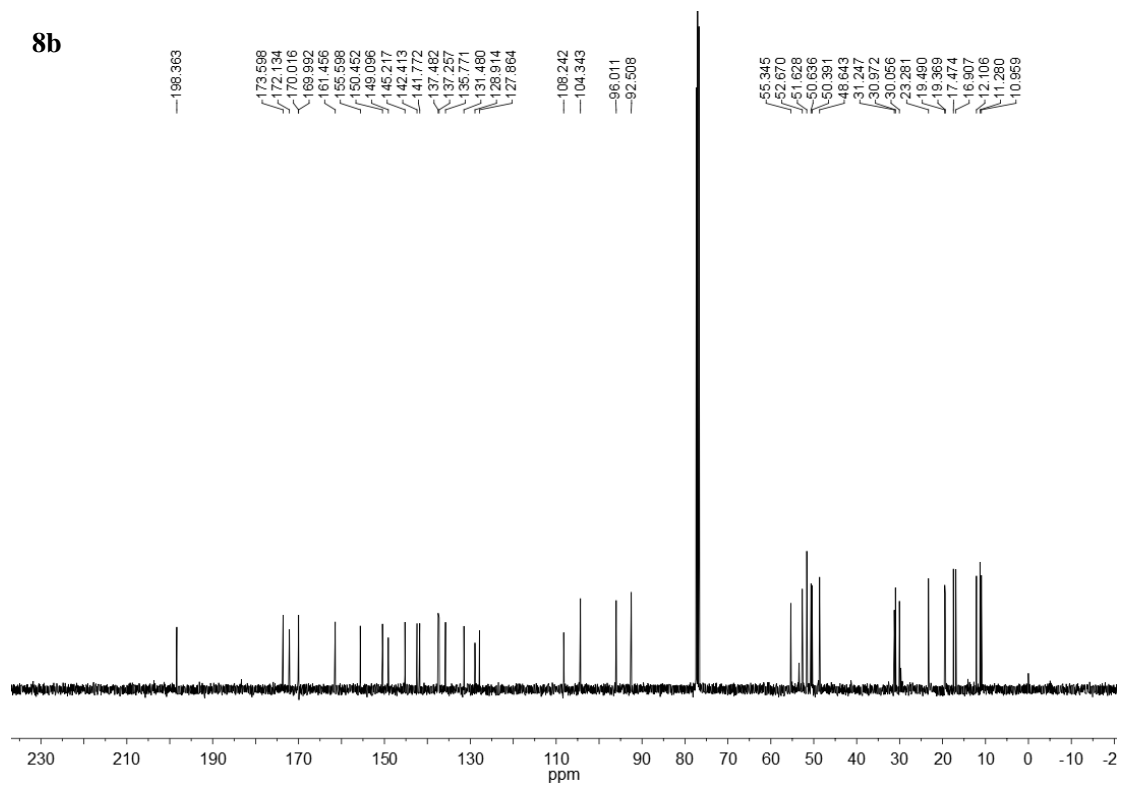

8b

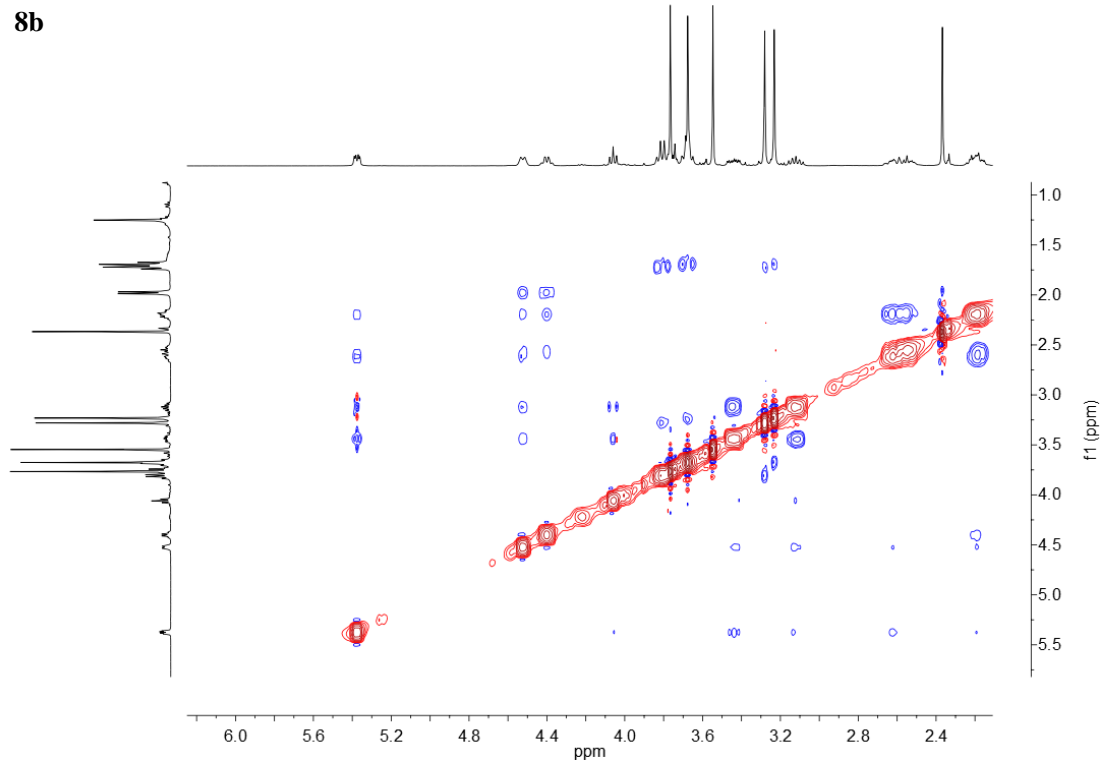

+Q1: 238 MCA scans from Sample 5 (TuneSampleID17) of Iijiazhu10.10 .wiff (Turbo Spray)

Max. 1.2e7 cps.

8b

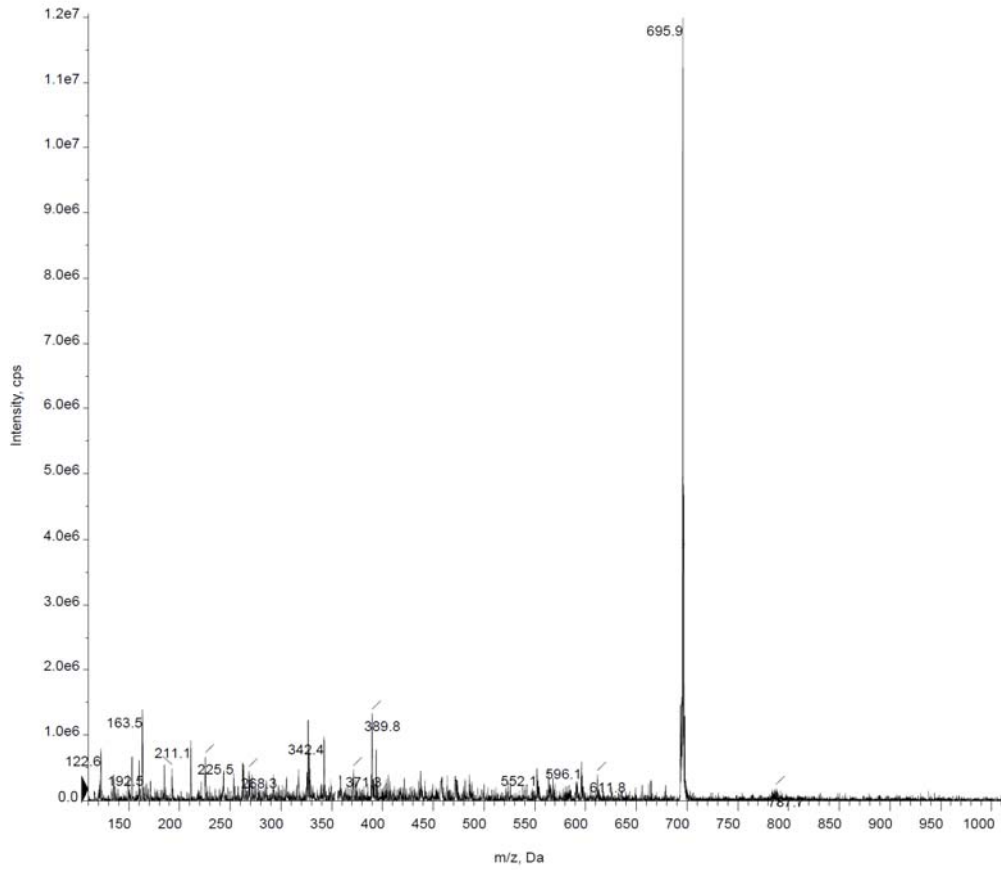



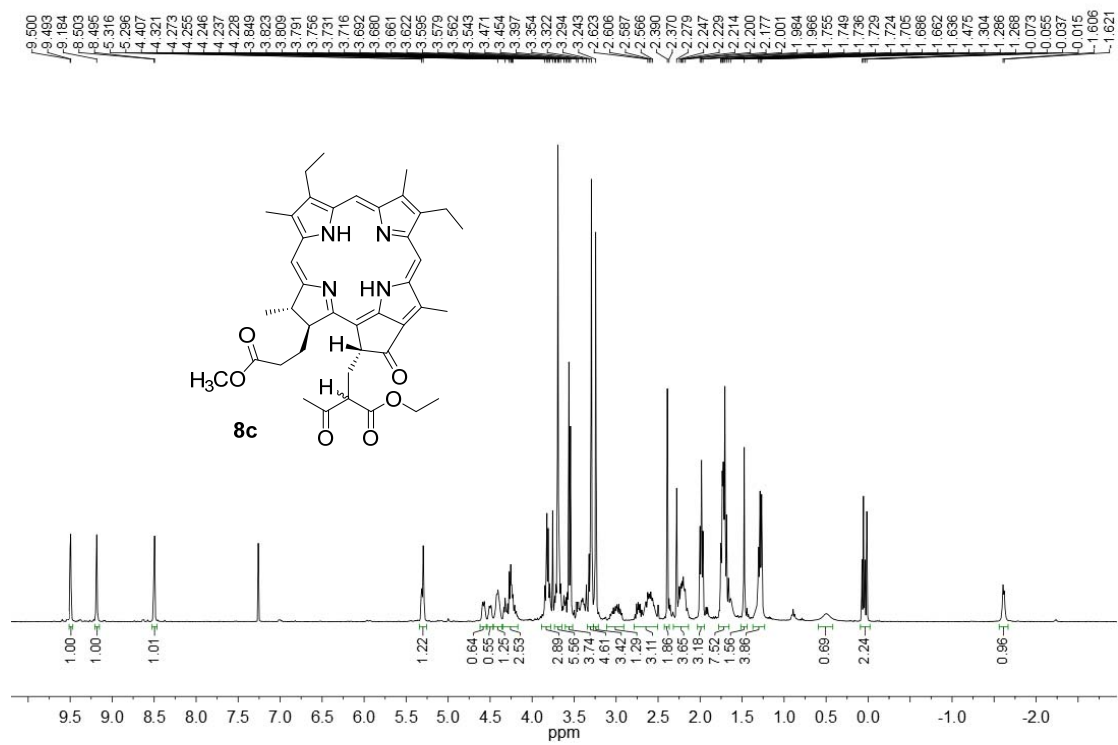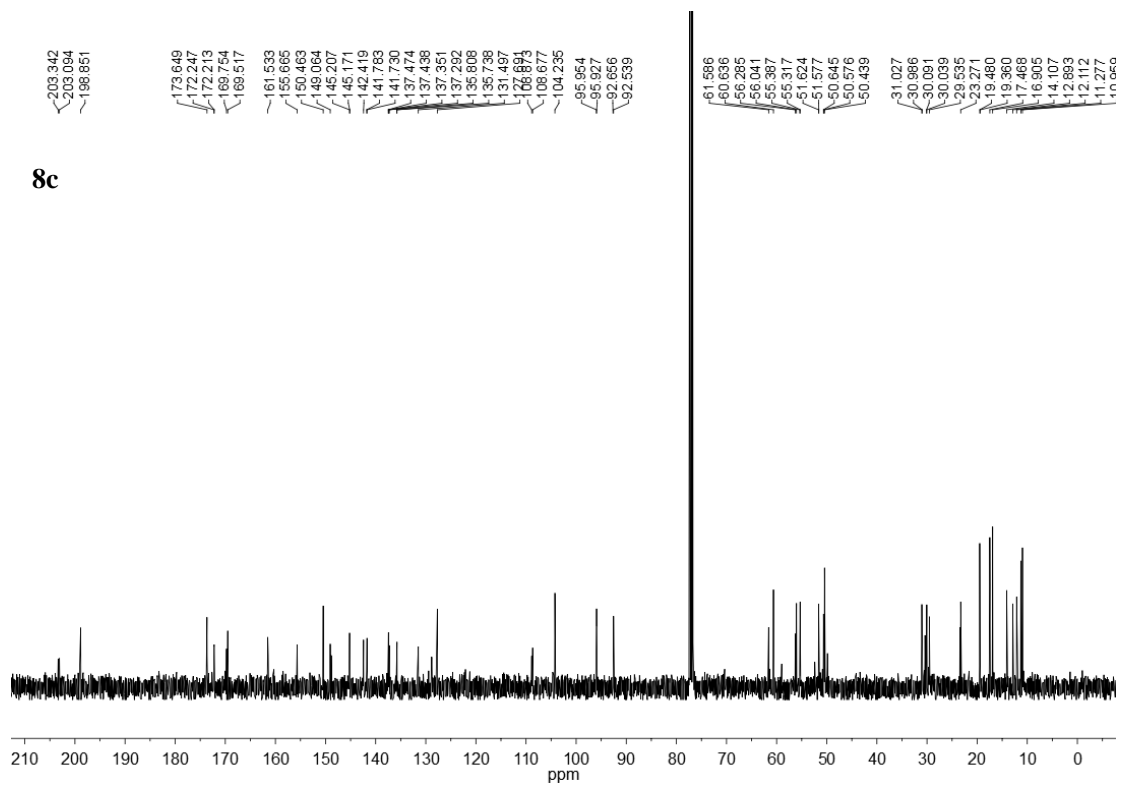

8c

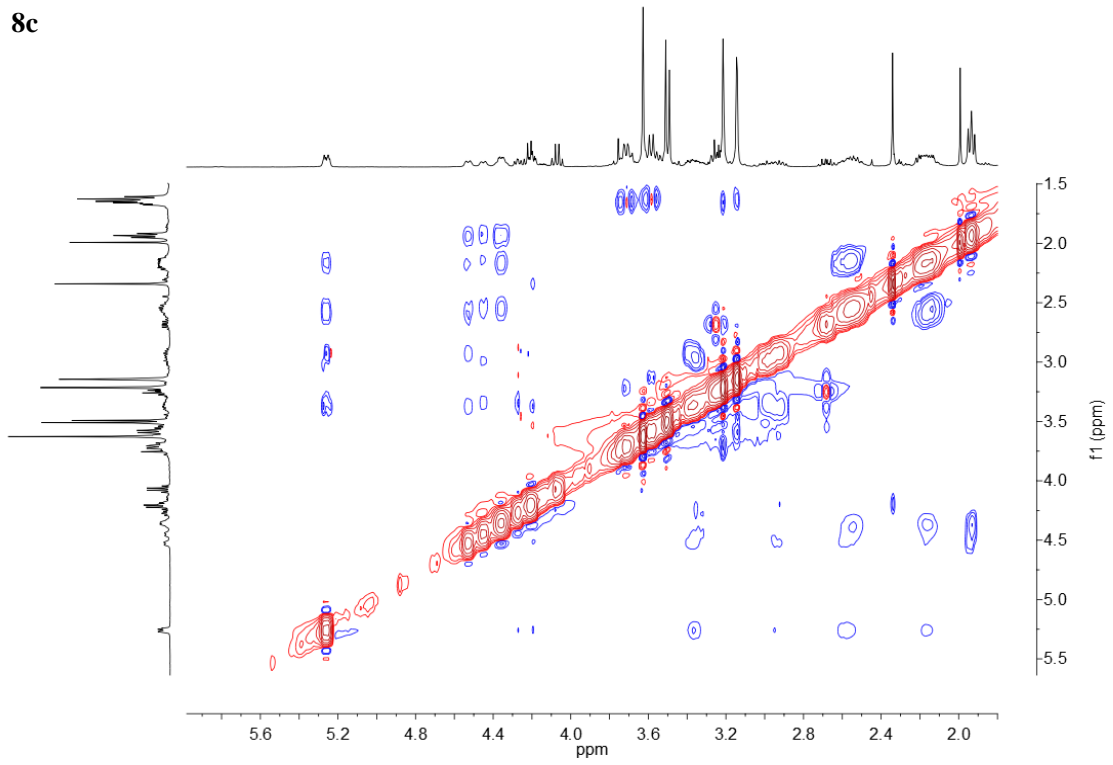

+Q1: 238 MCA scans from Sample 6 (TuneSampleID19) of Ilijazhu10.10 .wiff (Turbo Spray)

Max. 2.0e8 cps.

8c

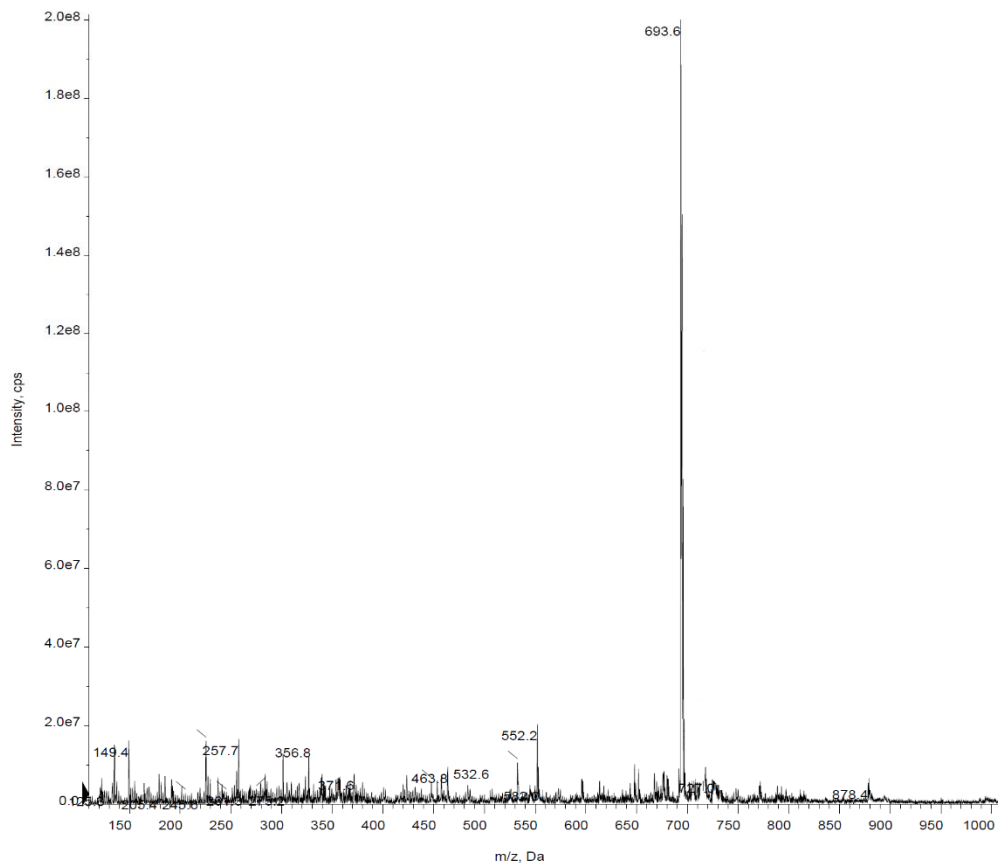

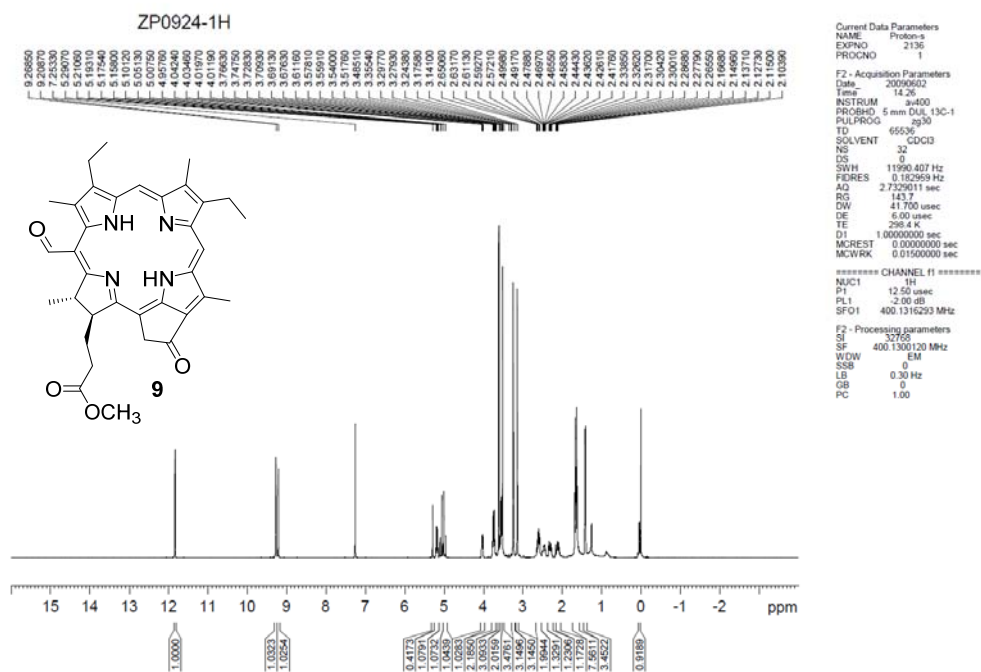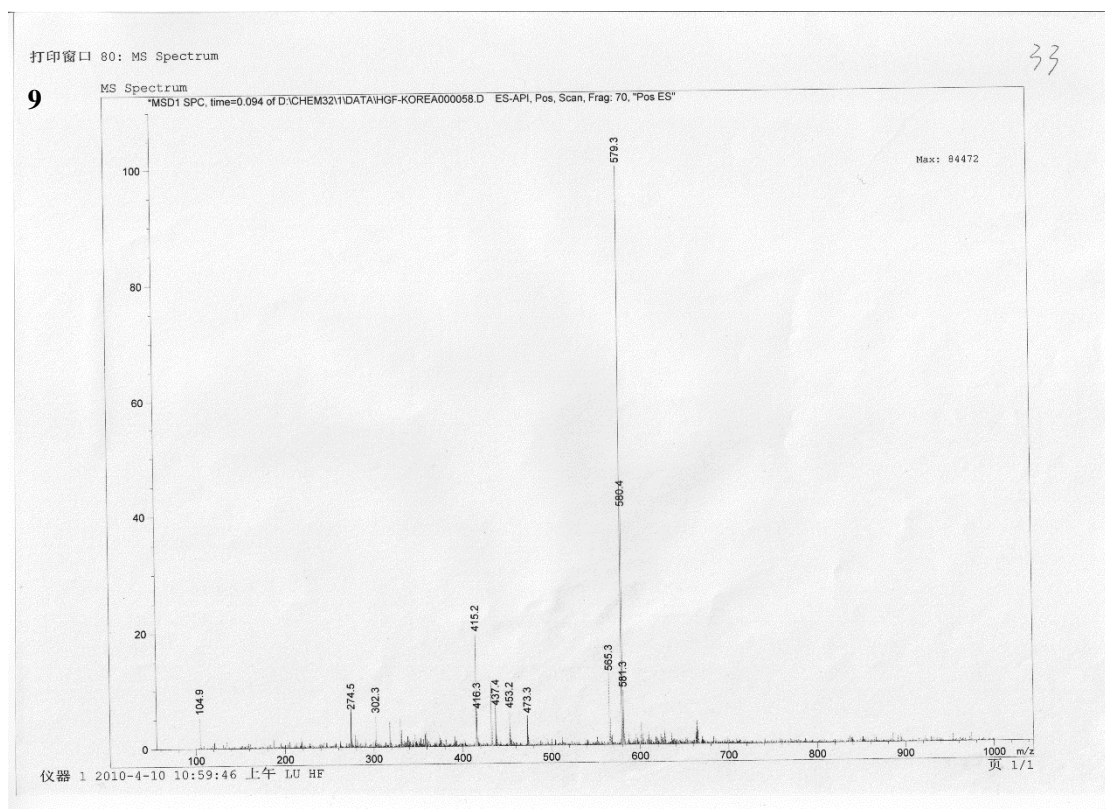

## 5. References

- [1] K. M. Smith, D. A. Goff and D. J. Simpson, *J. Am. Chem. Soc.*, 1985, **107**, 4946-4954.
